# Supplementary material
Source: publisher figshare collection journal article supplement (https://karger.figshare.com/ndownloader/files/13112585)
Supplement: Supplementary file 1 [file 13112585]

Supplement: The main causes of death in CI and non-CI group

|  | Cerebrovasculardisease (%) | Cardiovascular disease (%) | Tumour (%) | Infection (%) | Others (%) |
| --- | --- | --- | --- | --- | --- |
| CI group  (n=15) | 9 (60) | 4 (26.6) | 1 (6.7) | 1 (6.7) | 0 (0) |
| Non-CI group  (n=5) | 3 (60) | 1 (20) | 0 (0) | 0 (0) | 1 (20) |
